# Supplementary material
Source: publisher figshare collection journal article supplement (https://aacr.figshare.com/ndownloader/files/40570324)

**Table S2:** The prevalence of PSMA and Cell Search CTC positivity (≥5) at baseline and progression, as well as the observed median and optimal cutoffs for PSMA CTC.


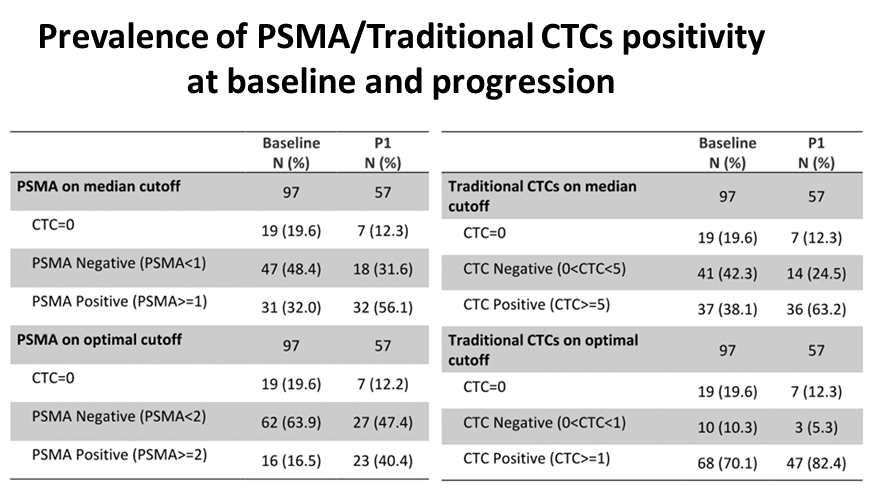

Supplement: Supplementary file 1 [file 40570324]
